# Supplementary material for: Phylogeography of the finless porpoise (genus Neophocaena): testing the stepwise divergence hypothesis in the northwestern Pacific
Source: PubMed Central journal article supplement — Sci Rep. 2014 Oct 10;4:6572. doi: 10.1038/srep06572 (PMC4193091; doi:10.1038/srep06572), 2014-10-10
Supplement: srep06572-s1.pdf [file srep06572-s1.pdf]

**Phylogeography of the finless porpoise (genus *Neophocaena*):  
testing the stepwise divergence hypothesis in the northwestern  
Pacific**

Wenzhi Lin<sup>1,2</sup>, Céline H. Frère<sup>3,\*</sup>, Jia Xia<sup>1</sup>, Duan Gui<sup>1</sup>, Yuping Wu<sup>1,\*</sup>

1 State Key Laboratory of Biocontrol, School of Life Sciences, School of Marine Sciences, Sun Yat-Sen University, Guangzhou 510275, PR China;

2 Guangdong Pearl River Estuary Chinese White Dolphin National Nature Reserve, Zhuhai 519080, PR China;

3 Center for Ecology and Conservation, College of Life and Environmental Sciences, University of Exeter, Cornwall Campus, TR10 9EZ UK

Fig. S1

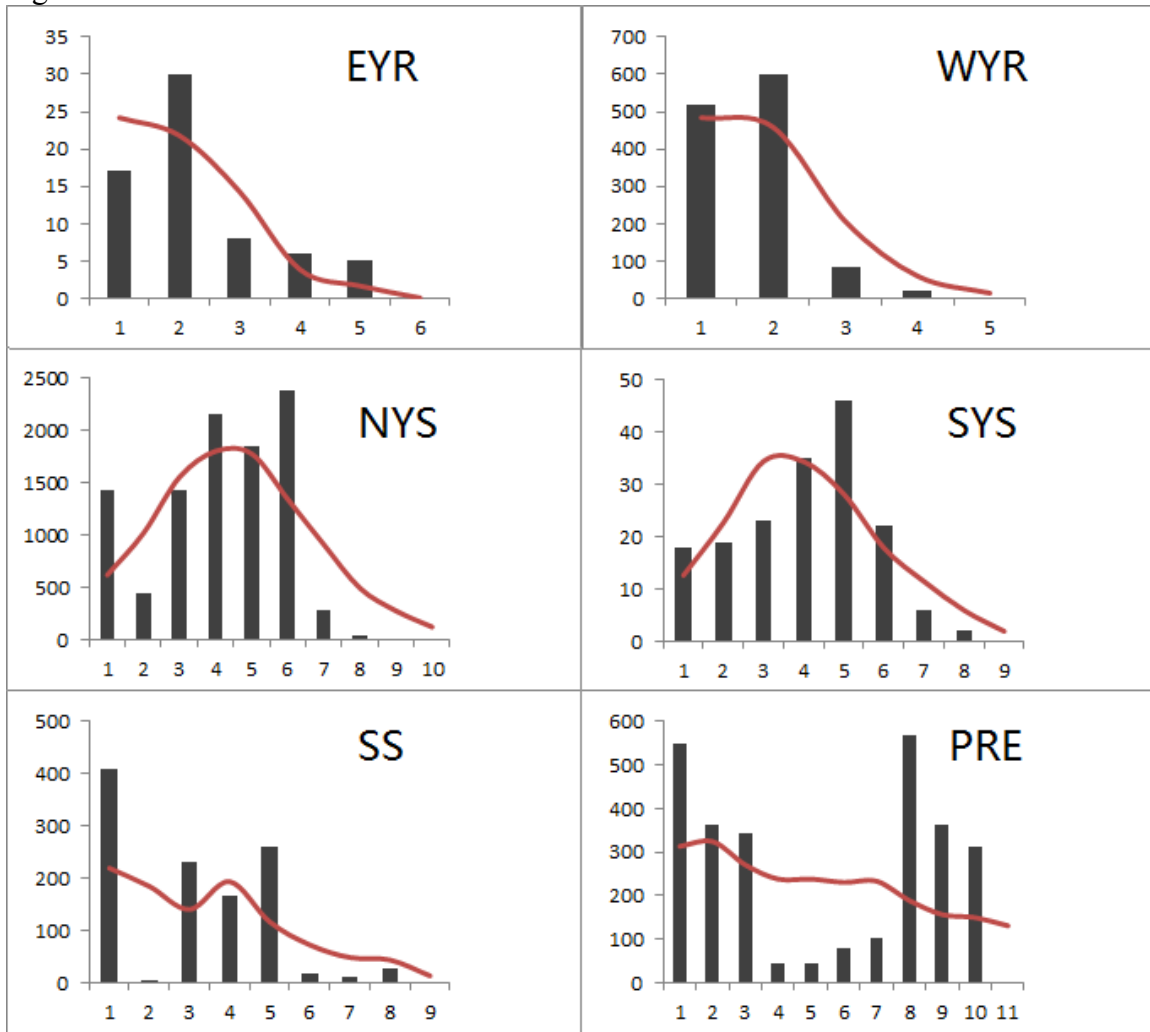

Mismatch distribution for the six studied populations of *Neophocaena*. The bars and lines represented the observed and simulated data. Since the  $F_{st}$  suggested not differentiation between the NSS and SSS population<sup>49</sup>, they were combined into one population (SS) during the mismatch analyses.

Fig. S2

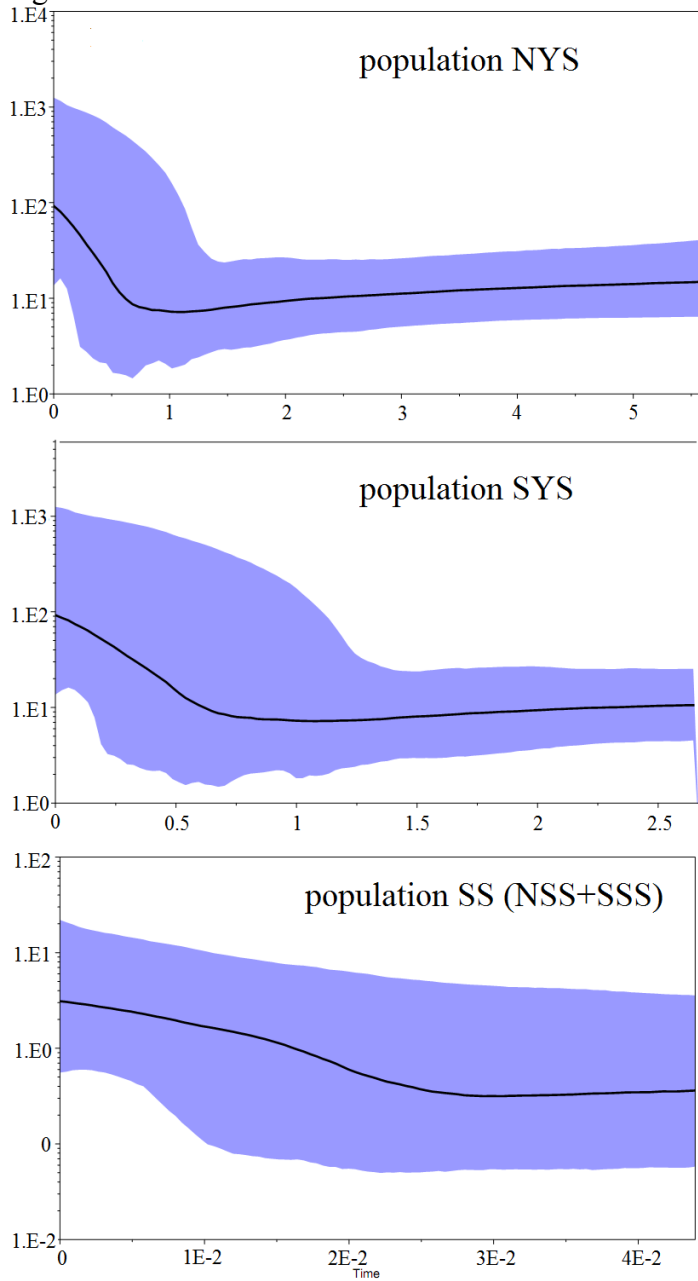

Skyline plots of the NYS, SYS and SS (NSS plus SSS) populations illustrating a demographic expansion signal. The historical  $N_e$  before the expansion was estimated as a proportion of the current  $N_e$ , roughly as 10%, 10% or 15%, separately.

Fig. S3

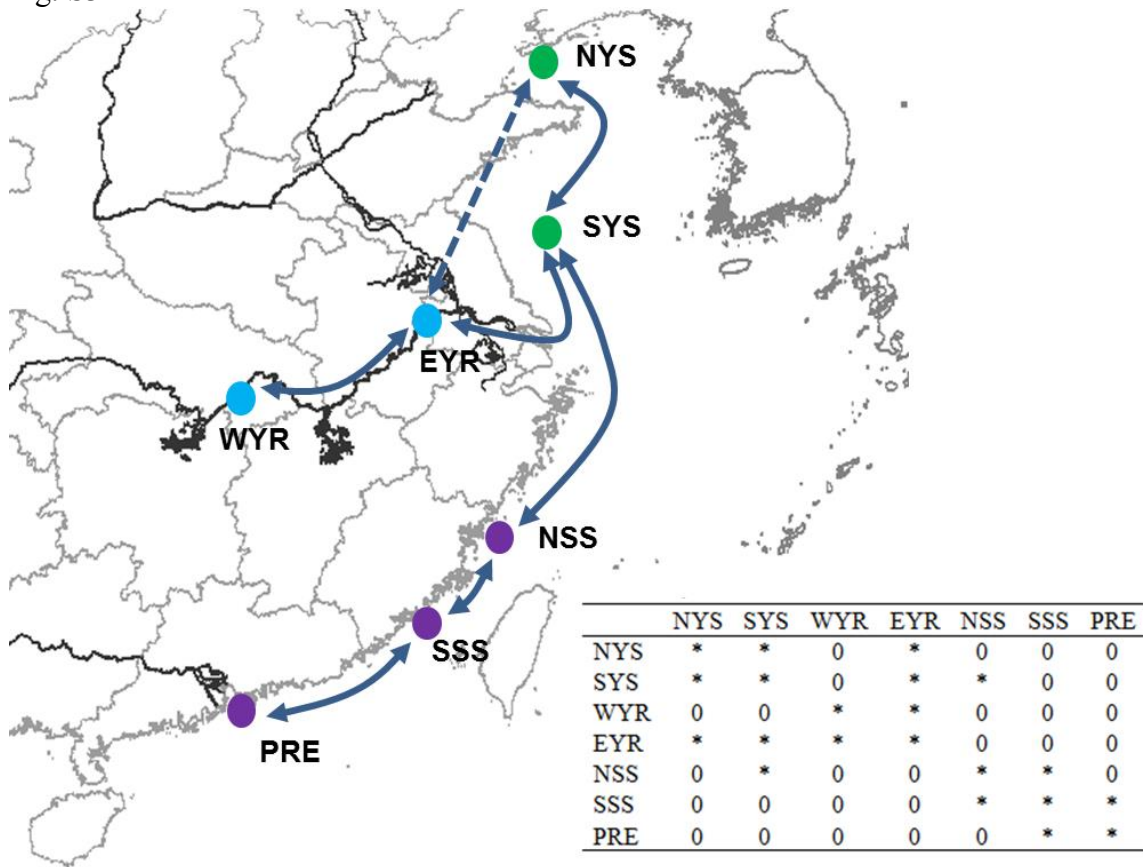

The stepping-stone model used for estimating the migration rate of *Neophocaena* spp. in the northwestern Pacific.  $M$  was estimated between neighboring populations because animals were expected to migrate along the coastline or river way.  $M$  between the NYS and EYR populations (shown with dashed line) was also calculated since the river mouths of the Yangtze River expanded during the marine regression. The table in the bottom right presents the corresponding matrix used for Migrate-n analyses. 0: not estimated; \*: estimated without restriction. The map was generated using ArcGIS 9.2. The coastline and hydrologic data was available on web at <http://www.natureearthdata.com/downloads/> (Date accessed: Jun, 2011) and <http://www.mapcruzin.com/download-shapefile/asia-waterways-shape.zip> (Date accessed: Jun, 2011).

Table S1. The  $\theta$  and  $N_e$  used for the Stepwise-divergence-hypothesis (SDH) and Recent-divergence-hypothesis (RDH) testing.

| Populations | $\theta$ |         |         | $N_e$  |       |        |
|-------------|----------|---------|---------|--------|-------|--------|
|             | 25.00%   | mode    | 75.00%  | 25.00% | mode  | 75.00% |
| <b>SDH</b>  |          |         |         |        |       |        |
| NYS         | 0.00433  | 0.00543 | 0.00647 | 23032  | 28883 | 34415  |
| SYS         | 0.00587  | 0.00990 | 0.01800 | 31223  | 52660 | 95745  |
| WYR         | 0.00100  | 0.00203 | 0.00293 | 5319   | 10798 | 15585  |
| EYR         | 0.00193  | 0.00317 | 0.00460 | 10266  | 16862 | 24468  |
| SS          | 0.00340  | 0.00463 | 0.00580 | 18085  | 24628 | 30851  |
| PRE         | 0.00453  | 0.00577 | 0.00707 | 24096  | 30691 | 37606  |
| <b>RDH</b>  |          |         |         |        |       |        |
| SS+PRE      | 0.00580  | 0.00710 | 0.00853 | 30851  | 37766 | 45372  |
| EYR+WYR     | 0.00200  | 0.00310 | 0.00420 | 10638  | 16489 | 22340  |
| NYS+SYS     | 0.00807  | 0.00957 | 0.01113 | 42926  | 50904 | 59202  |
